# Supplementary material for: RETRACTED: FSM-F: Finite State Machine Based Framework for Denial of Service and Intrusion Detection in MANET
Source: PLOS journal article supplement (doi:10.1371/journal.pone.0156885), 2016-06-10
Supplement: S1 (10.1371/journal.pone.0156885.s001) [file journal.pone.0156885.s001]

# DoS and Intrusion Detection for MANET

I would recommend :Commented [u1]  
standardising the formatting throughout this  
.paper

## Abstract:

Mobile ad hoc networks (MANET) applications have become widely used nowadays, due to the unique characteristics offered by this type of wireless networks. ~~I Conversely,~~ intrusion attacks have also increased and diversified, ~~leading to the need for necessitating~~ an effective intrusion detection to ~~detect-identify~~ these intrusions. ~~In this paper, we propose A~~ an intrusion detection algorithm ~~is proposed in this paper,~~ based on the Finite State Machine, ~~for~~ detecting different types of intrusion and Denial of Service attacks ~~throughin~~ MANET. The simulation shows that ~~this study's~~ our intrusion detection has results which are considerably better than those offered by other available applications ~~considerable better results.~~

Commented [u2]: Is this factually correct following my  
grammatical changes?

**Keywords:** MANET; IDS; security; intrusion detection.

## 1. Introduction:

In ~~the~~ recent times, intrusion detection systems for MANET have received considerable attention, as a result of the importance of this kind of networking in ~~our~~ daily life, and this has ~~coincided~~ coincided with increased attacks on them. Most of today's applications are real-time applications, which need to ~~depend on~~ delivering data at the in a right time and ~~with the use of~~ availability of resources. Any activity in a computer system that violates ~~any of~~ the security or availability of resources can be classified as an intrusion [1]. Preventive and reactive approaches are applied by most of security solutions, in order to protect MANET's routing protocol, services and applications. Preventive schemes based on encryption algorithms and key management ~~help to~~ prevent unauthorized actions from affecting normal MANET operations of MANET, but these schemes add additional load traffic to the already limited bandwidth and ~~limited~~ power of MANET [2]. Reactive security mechanisms serve as a ~~is~~ second defence line that detects and stop attacks, that have ~~which~~ passed through the first defence line. An Intrusion Detection System (IDS) can be used as an effective reactive mechanism for ~~to~~ detecting misuse and perversion. It ~~statistically analyzes~~ analyses the ~~statistically~~ the normal and abnormal behavior ~~behaviour~~ of nodes, by collecting information from legitimate users ~~over~~ during a period of time [3].

IDS is software ~~is~~ designed to provide monitoring systems for network activities, ~~to~~ detecting if there are any suspicious activities or policy violations. It considered ~~as~~ a second line of ~~defense~~ defense [4] & [5], while; it also generates a report about the situation of the network to the security system, in order to ~~allow~~ take an appropriate action to be taken against the detected attack. Traditional wired networks using Intrusion Detection (ID) algorithms are not suitable for mobile ad hoc networks, ~~this~~ because of the differences ~~regarding~~ of their characteristics, structures, and operations.

?Is this right :Commented [u3]

~~This paper proposes~~In the paper, we proposed Interruption Detection AODV (IDAODV) as a means of detecting Intrusions Denial of Service attacks in MANET. ~~This study's~~ Our system using a Finite State Machine (FSM) to recognize the dynamic assaults continuously, instead of using the realistic checking ~~of long ago caught activity~~of long ago caught activity.

~~This paper~~The remaining part of the paper, we will briefly introduce and discuss a brief of related works in section 2, and then AODV routing attacks in section 3. In section 4, it will we discussed the our proposed Intrusion Detection System (IDS), and will obtain gets results with a discussion in section 5.

## 2. Related Works

There are many proposals regarding on lightweight IDS, but they have mainly focused mainly on sacrificing lightweight accuracy sacrificing lightweight. They select more features from the collected audit data, as a means of realising accuracy, which may in turn in order to realize accuracy, which may increase the weight of the intrusion detection algorithm. Some of the proposed lightweight intrusion detection agents, such as that of Tokekar and Jain [6], collect audit data periodically within in each specific timeframes. To make the IDS lightweight, as a means of saving in order to save energy, this allows other nodes with available batteries to participate in intrusion detection. However, but periodic data collection is still a problem, it making the IDS heavyweight. Mutly et al., and Xenakis et al., have proposed that distributed cooperative intrusion detection, involving the exchange of intrusion reports between nodes detection engine nodes, can increase the detection. However accuracy, but the additional communication overhead will result in cause significant decreases infor the network performance, and making the intrusion algorithm heavyweight [7] & [8]. An adaptive problematic nodes method has been proposed by A. Nadeem et. al, to evaluate the performance of the internal link into localiszing malicious nodes and detecting faulty links [9]. The authors' claims that the proposed scheme beats the existing security approach for improving anomaly-based detection approaches, considering resource-constrained MANETs. They also claim, also, they claims that they are the first to introduce NT technology as a means of developingto develop intrusion detection and spatial-time monitoring for MANET. Therefore, generally ID algorithms are considered to be lightweight if they consumes less energy.

Kheyri et al., Nadeem et al., Joseph et al., and Damopoulos et al., have all proposed Intrusion Detection Systems as a means of detectingto detect new and unknown attacks, while they can also it can also detect attacks that try totries to exploit unforeseen vulnerabilities [10], [11], [12] & [13]. Their ID systems are classified as behaviorbehavioral or anomaly-based detection systems. General false alarms and false positives are two well-known limitations of of the Intrusion Detection Systems famous limitations. Other limitations are correlated to this type of IDS, including exchanging of models among nodes, and the periodically normal profile updates which added significant overhead communication and processing overhead. Building the best knowledge database is take consuming more time and effort.

Based on the Timed Finite State Machine, Stamouli, Argyroudou and Tewari [14] has proposed a real time system for the AODV MANET routing protocol. They have He used a knowledge-based method to build real time monitoring system architecture called Real-time Intrusion Detection for Ad hoc Networks (RIDAN). The proposed architecture works as an interface between the network

What this means isn't clear, but I :Commented [u4] haven't altered the content, as I don't want to .hnlcal contentchange what might be tec

Commented [u5]: ?Is this still factually correct

Should this be 'improving' :Commented [u6] ?accuracy

I've altered this content, as it :Commented [u7] seems to be correct when I looked up the document online. If there are any problems (or if you disagree with my changes in the bibliography) please free to make any required .alternations

?Was it correct to add 'S' here :Commented [u8]

Commented [u9]: I'm not sure what was originally meant in this statement, but I've made some changes to make it grammatically correct. If there e knoware related problems please let m

I would review the paper to :Commented [u10] .change 'ID' to 'IDS' as and when required

-I would recommend double :Commented [u11] checking reference name spellings

layer and the link layer, ~~it~~ countering attacks by lessening their ~~its~~ effectiveness, and keeping performance within acceptable levels. RIDAN does not employ any authentication technique, and therefore it cannot detect any attack that violates authentication.

### 3. AODV Routing Attack:

AODV presents numerous ~~opportunities~~ chances ~~for~~ to assailants. ~~This study first~~ We first identified distinguish various abuse objectives that an inside assailant may need to accomplish [15]. The abuse objectives might include ~~might be~~ one or more ~~a greater amount of~~ the following ~~accompanying~~:

?Should this be 'want': **Commented [u12]**

- Route Disruption: Route Disruption involves ~~implies~~ either breaking down a current course, or preventing ~~keeping~~ another course from being secured.
- Route Invasion: Route intrusion implies that an inside assailant can includes themselves ~~itself~~ into a course between two end-points within ~~of~~ a corresponding channel ~~channel~~.
- Node Isolation: Node disconnection refers ~~alludes~~ to keeping a given hub from imparting with any ~~whatever~~ other hub in the system. This ~~it~~ contrasts with ~~from~~ Route Disruption, in that Route Interruption ~~is~~ focuses on ~~ing~~ at a course with two given end-points, while hub disconnection covers ~~is going for~~ all conceivable courses.
- Resource Consumption: This ~~it~~ refers to consuming the correspondence data transmission within the system or storage rooms at individual hubs. For example ~~ease~~, an inside assailant may devour the system data transmission by either ~~shaping~~ a circle in the system.
- Denial of Service.

?Typo: **Commented [u13]**

To attain these objectives, the following ~~the accompanying~~ abuse activities or assaults may be performed:

#### Packet Dropping Attack:

In a bundle dropping assault, the assailant essentially drops the received-delivered message. Bundle dropping can be ~~is identified~~ recognized through ~~by~~ checking whether a neighbor ~~neighbour~~ advances parcels towards the last objective. In order to ~~To~~ have the capacity to do this, it is important to keep up a neighbor ~~neighbour~~ table. This assault might be partitioned into different subcategories. In the event that an assailant applies such assaults to all the Route REQuest (RREQ) messages it obtains ~~gets~~, this sort of abuse is comparable to not having the assaulting hub in the system. An inside assailant may additionally specifically drop RREQ messages. Aggressors that dispatch such abuses are by ~~in~~ their nature comparable to ~~the~~ narrow-minded hubs. In the event that the assailant applies this assault to a Route REPlY (RREP) message, this ~~it~~ can now and again result in ~~prompt~~ course disturbance. The assault can be additionally be ~~connected~~ to information parcels, through which ~~where~~ an inside assailant keeps an exploited person hub from accepting information parcels from different hubs over ~~for~~ a brief period ~~time~~ of time. The assailant may make the a number of ~~accompanying~~ alterations after it obtains ~~gets~~ a RREQ message from the exploited person hub, which can include: increasing ~~(1) Increase~~ the RREQ ID by a small amount ~~little number~~, replacing ~~(2) Replace~~ the goal IP address with a non-existent IP address, increasing ~~(3) Increase~~ the source grouping number by no less than one, and setting ~~(4) Set~~ the source IP deliver in the IP header to a non-existent IP address. The aggressor then telecasts the manufactured message.

**Commented [u14]:** Is this the correct term? 'Recieved' did not seem to be appropriate'

?be 'assaulted hub should this': **Commented [u15]**

At the point when the ~~assailant neighbors~~ ~~neighbours~~ ~~receive of the assailant~~ get the faked RREQ following jump ~~from~~ ~~to~~ the source hub ~~to~~ the non-existent hub, since the faked RREQ message have a more prominent source arrangement number. Because of the non-existent end IP address, the faked message could be telecasted to the most distant hubs ~~of~~ ~~in~~ the commercial hoc system. At the point when different hubs need to send information bundles to the source hub, they will utilize the courses built by the faked RREQ message, and the information parcels will be dropped ~~due~~ the non-existent hub. This assault, notwithstanding, ~~cannot~~ completely detach the victimized person hub due to ~~neighborhood~~ ~~neighbourhood~~ repair instruments ~~within~~ ~~in~~ the AODV convention. will launch an alternate round of course disclosure, in the event that they notice that the information bundles ~~cannot~~ be conveyed effectively. Moreover, the victimized person hub may ~~not~~ even ~~not~~ the capacity to send information parcels to different hubs. A few ~~of the~~ nuclear abuses of RREQ use RREQ messages to include entrances ~~to~~ the steering table of different hubs. These sections are not the same as those secured through ~~the~~ ordinary trade of RREQ and RREP messages. Specifically, the lifetime of these sections ~~relates~~ ~~is situated~~ to ~~the~~ default esteem, ~~specifically (e.g., as determined by this study's~~ ~~in our~~ investigations). Subsequently, ~~in order~~ to make such passages successful, an aggressor needs to ~~intermittently~~ dispatch ~~the~~ nuclear abuses ~~intermittently~~.

#### Sequence Number Attack

The ~~a~~ arrangement number demonstrates the freshness of courses to the related hub. An assailant conveys an AODV control parcel, ~~which~~ ~~it~~ produces a substantial arrangement number of the exploited person hub, ~~as~~ it will change the course to that exploited person hub. The succession number could be expanded ~~on in order~~ to overhaul ~~the~~ other hubs' opposite course tables, or ~~to~~ diminish ~~it as a means of~~ ~~to~~ stifling its redesign. This can apply to ~~either~~ the Source Sequence Number or the Destination Sequence Number. RREQ ID, alongside the source IP address, ~~can~~ ~~exceptionally effectively~~ distinguishes a RREQ message. ~~It will~~ ~~;~~ ~~they~~ show the freshness of a RREQ message. Since a hub ~~just~~ acknowledges ~~only the~~ ~~the~~ first duplicate of a RREQ message, an expanded RREQ ID alongside the source IP location can ~~promise ensure~~ that the faked RREQ message is acknowledged by different hubs.

#### 4. Interruption Detection AODV (IDAODV)

IDAODV ~~is~~ focuses ~~on the~~ ~~d~~ ~~around~~ State Transition Analysis Technique, which was ~~at~~ first created ~~in order~~ to model host-based and system-based interruptions in a wired ~~the~~ earth. ~~Among~~ ~~Of~~ all the directing conventions proposed for MANETs, AODV has been ~~the most prevalent, and has turned into an~~ ~~exceptionally prevalent and has turn into an~~ Internet standard. ~~A~~ ~~This~~ additionally, ~~this~~ has been ~~an~~ ~~the~~ explanation behind AODV ~~getting to be~~ ~~becoming~~ more and more helpless against assaults.

#### Outline of Interruption Detection AODV

~~Our~~ ~~This study's~~ system ~~is~~ focuses ~~on~~ ~~d~~ ~~around~~ the work ~~displayed~~ ~~presented by~~ ~~Stamouli et al.~~ ~~in~~ [14]. Like RIDAN, ~~the~~ ~~our~~ system ~~of~~ ~~Stamouli et al.~~ utilizes Finite State Machines to empower the continuous recognition of dynamic assaults. ~~Additionally~~ ~~Then again,~~ RIDAN does not offer an answer for conveyed structural planning, ~~to~~ ~~distinguishing~~ assaults that require more than one-jump data. ~~The~~ IDAODV could be described as a building design models for interruption locations in remote Ad Hoc systems. ~~We~~ ~~call~~ ~~this~~ ~~can be referred to as~~ a structural planning model, on the grounds that it does ~~not result in~~ ~~it~~ ~~perform~~ any changes ~~to~~ ~~in~~ the underlying directing convention.

but rather yet simply blocks steering and application activity. IDAODV has been actualized on AODV, which has as of late turned become into an Internet standard. In any case, the assaults that is intended to identify recognize are particular to the AODV convention. The methodology of the assaults, and the general structural planning that might be reached out to work, has no overlap different conventions like DSR. The framework takes after learning-based systems to catch system interruptions. The way that it utilizes the Finite State Machine (FSM) empowers the framework discover vindictive actions continuously, instead of utilizing the factual examination of long ago caught activity. long ago caught activity. A limited state machine could be characterized as a of a set of states, that include the (counting the introductory state), a set of information occasions, occasions, and a state move capacity. The capacity takes the current state and an information occasion, and gives back when it is due a set of yield occasions and the following state. The state machine can additionally be seen as a capacity, which serving to maps a requested grouping of occasions into a comparable arrangement of yield occasions. The interruption discovery part mainly by in every taking an interest hub, and accordingly its execution relies on upon the system of the quantity of bundles obtained got through in at which at ever time unit, specifically through one FSM, that there are some pieces of the interruption recognition part that may need to be The FSM was developed in the wake of concentrating on the inner operations of the AODV directing convention. In order to perceive the activity examples that occur happening when a pernicious assault takes place is performed against the directing fabric, the convention's movement for the convention was dissected in terms of both its static and portable conditions. Figure (1) presents delineates the top-level building design of IDAODV.

Commented [u16]: every' was confusing in this ' if this changes the - .sentence, so I removed it meaning, please let me know and I will address it .again

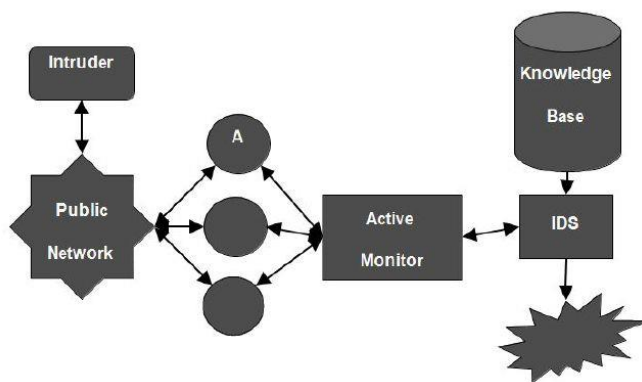

Figure (1): The Architecture of IDAODV

## Details of IDAODV

This study will now present We now depict the points of interest regarding the outlining and proposed IDAODV. IDAODV recognizes assaults against the AODV directing convention through in Wireless Mobile Ad Hoc Networks. The component parts of IDAODV have been are through the in the accompanying segments.

In this diagramme (the :Commented [u17] explosion) needs to be explained more. I'm not ..sure what it means

## Network Monitor (NM)

The approach of way of Ad Hoc systems preventsforbids any single IDS hub fromto watching all withinmessages in a solicitation answer stream. Therefore,Hence, following of RREQ and RREP messages, in an appeal answer stream must be performed through anby appropriated system screens (NM). Figure (2) portrays the building design of a system screen. System screens latently listen to the IDAODV steering message, and recognisze wrong RREQ and RREP messages. Gathered messagesMessages are gathered focus oned around the appeal answer stream in which they have a placeto which they have a place. An appeal answer stream might be interestingly recogniszed by the RREQ ID, including the source and end of the line IP addresses.

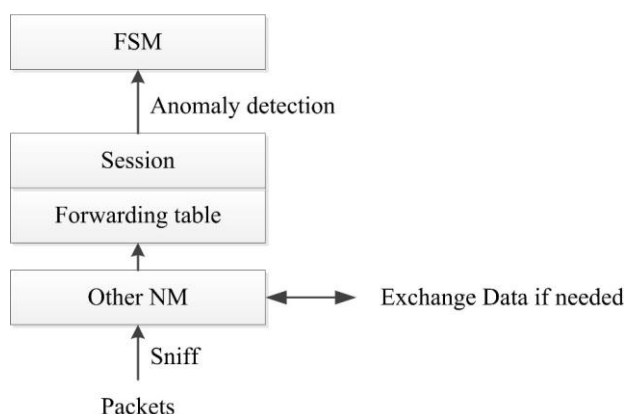

Figure (2): Network Monitor

In the above, 'Data' should not be capitalised

## Finite State Machine

Specification-based approaches provides a model forte analyszing attacks, based on protocol specifications. A dDetail-based methodology offersgives a model forte examining assaults with a focused onaround convention determinations. A system screen utiliszes a finite state machine (FSM) [16], in order to identifyfor identifying erroneous RREQ and RREP messages [17]. This maintainsIt keeps up a FSM for each one extension of an appeal answer stream. An appeal stream begins at the 'Source' state. It travels to the 'RREQ Forwarding' state when a source hub shows the first RREQ message (with another REQ ID). At the point when a sent television RREQ is discovered, it stays in the 'RREQ Forwarding' state unless a comparableing RREP is identifieddistinguished. At that point if an unicast RREP is recogniszed, it goes to the 'RREP Forwarding' state and stays there until it achieves the source hub and the course is situated up. In the event that any suspicious movement or a-peculiarity is distinguished, it goes to the 'Suspicious' or 'Alarm' states. At the point when a NM contrasts between another bundle and the old relating parcel, the essential objective of the demands is to verify that the AODV header of the sent control parcels hasis not changed in an undesired way. On the off chance that a middle of the road hub reacts to the appeal, the NM will confirm this reaction from its sending table, and additionally with the obligations to verify that the halfway hub is not lying. Furthermore, the stipulations are utiliszed in order to recognisze bundle drop and caricaturing. Stamouli et al. [14] has not utiliszed



system screens to follow RREQ and RREP messages in an appeal answer stream for the dispersed system. ~~Meanwhile~~ While in the proposed FSM, ~~this study has, we~~ utilized the above streams.

### Sequence Number Attack Detection

In ~~orderplace~~ for the interruption discovery to distinguish the succession number assault, ~~we this study~~ dissected the RREQ and RREP messages. ~~The research~~ We mimicked the assessment of ~~the assess~~ IDS execution in both static and versatile conditions. The hubs ~~identified~~ picked as NM were static in both ~~the cases~~, in light of the fact that it is accepted that NM does not leave the allotted screen. New RREQ, for which the source hub is not enrolled ~~in at~~ the ~~neighboringneighbouring~~ NM, sent RREP unicast by middle hub and no irregularity ~~was~~ identified. The IDS, follow~~ing~~ed the diverse RREQ and RREP streams, started by the hubs. The IDS brought about postponing the course disclosure, ~~due to because of~~ including observing messages, and in addition ~~to the~~ handling overhead in the checking hubs.

## 5. Results and Discussion

The tests were reproduced using NS-2. The accompanying area's subtle elements ~~included are~~ the nature's domain, measurements and ~~the~~ results.

### Simulation Environment:

- Grid Size: 1000x1000 Meters
- Packet Traffic: ~~Ten+0~~ Constant Bit Rate (CBR) Traffic associations were produced ~~all the while~~. Four hubs were ~~the~~ hotspots for two streams ~~in every case~~, and ~~each of the~~ two hubs were ~~the~~ hotspots for a solitary stream ~~each~~. ~~The e~~End hubs ~~received~~ just ~~get~~ one CBR stream each.
- Nodes: An aggregate of 40 hubs were ~~reenactedre-enacted~~. Of these, 16 were imparting. ~~The n~~Number of terrible hubs ~~was~~ fluctuated throughout the reproduction.
- Mobility: ~~The r~~Random waypoint model was picked, with ~~the~~ greatest seed set to 20 meters for every second. ~~The s~~Stop time was ~~determined assituated to~~ 15 seconds.
- ~~R~~outing Protocol: AODV
- Mac Layer: 802.11, ~~with the~~ shared MAC Layer model ~~was~~ utilized.
- Radio: ~~This study~~ We utilized the 'no blurring' radio model, with the radio reach set to 250 meters.
- Simulation Time: 900 Seconds
- ~~D~~ropped Packet Timeout: ~~The t~~Timeout period ~~lastedwas situated to~~ 10 seconds
- ~~D~~ropped Packet Threshold: ~~This was set~~Set to 10 bundles
- Clear Delay: ~~This was s~~Set to 100 seconds, ~~asthis is~~ an occasion lapse clock. This ~~was~~ the measure of time, ~~through whichfor which~~, a hub ~~c~~would ~~be~~ considered an occasion before touching base.

### Response to Intrusions

†  
~~This study's~~ Our interruption location convention ~~tookakes~~ into account either a dynamic or aloof reaction to interruptions. ~~With-In regards to~~ either reaction mode, the conclusion ~~involveds~~ the disconnection of the culpable hub from the system. In the uninvolved mode, a hub settled~~s~~ on a one-sided choice focused ~~onaround~~ its own particular perceptions of irregular conduct. The more regular and anomalous the conduct from the pernicious hub, the sooner the meddlesome hub will

be disengaged and ~~be~~ denied ~~connection to get to on~~ the underlying system framework. The reaction mode offers a larger amount of certification than ~~does~~ the latent mode. The expanded affirmation level is ~~a result of because of~~ a dominant part voting plan, and therefore, the flooding meddling hub's personality ~~all~~ through the system. The dynamic mode, then again, is more ~~minds~~ to actualize.

In ~~the case of~~ Passive Response, once the edge esteem, ~~which~~ mitigates the impacts of connection mistakes for message misrouting or message alteration, has been surpassed, an alert is raised. In the inactive mode, the hub that raised the caution expels the nosy hub from its ~~neighbor~~ neighbour table, and ~~it does~~ takes part in further course revelations, Hello Messages or collective directing with the meddling hub. Furthermore, the nosy hub's location is recorded in the Bad Node Table. ~~TAs his study presents in awe show in a~~ later segment ~~that as elements of analysis on become~~ subtler and the system becomes denser ~~elements of analyses are the denser the system,~~ there is a greater ~~more the~~ quantity of hubs ~~that all the while~~ announcing a hub meddling, and keeping the pernicious hub from using the system assets. On the off chance that the hub being referred to keeps ~~on~~ acting rudely, every hub in the system will inevitably settle on a one-sided choice to disassociate itself ~~from with~~ the interloper.

Dynamic Response, proposes the Cluster Based Routing Protocol (CBRP), ~~through which where~~ hub ~~groups are~~ structured ~~groups~~, each with a chosen bunch head. The ~~part role~~ of the bunch head ~~involves to~~ upgrading the course revelation process.

### Improvements

~~The R~~ reproductions utilizing NS-2 have demonstrated that ~~the~~ AODV forms ~~are that~~ utilizing ~~the~~ connection layer help ~~in has the~~ general ~~to better best~~ brings about practically ~~within~~ all recreations. ~~AODV has~~, ~~As previously mentioned said prior,~~ AODV ~~has~~ the preference that it adapts more data for each one appeal ~~than it~~ conveys. On the off chance that an appeal goes from S to D, and the answer from D to S, S will take in ~~to~~ the course ~~to~~ all moderate courses in the middle of S and D. This implies that it is not important to convey the same number of solicitations ~~as for~~ AODV. The source steering methodology is ~~therefore hence~~ useful ~~great in the~~ course revelation and course support cases. ~~Otherwise the other hand,~~ source directing is not ~~appropriate alluring for use in information bundles to use for information bundles.~~ Above all else, ~~this~~ includes a great deal of overhead. Besides, it is not as conventional with respect to ~~the~~ example separation vector, or ~~the~~ connection express ~~that are~~ generally utilized as ~~a parts of the~~ wired systems. ~~This study's~~ Our proposal ~~based is on along~~ these lines ~~intends~~ to execute a convention ~~that involving a blend is a blend~~ of source directing and separation vector. Source directing ought to be utilized within ~~the~~ course revelation and course upkeep stages. These stages would likewise ~~incorporate~~ recognise that the directing tables are situated up progressively amid the spread of ~~the~~ solicitations and answers. At the point when ~~the~~ information parcels are sent, a separation vector calculation ought to be utilized. The bundles are basically sent to the next hop, as indicated by the directing table. This, ~~combined within mixture with that~~ the convention ~~that~~ stores a few courses for every goal, ~~are~~ would likely mean a convention with an execution ~~that is significantly~~ ~~tunningly~~ better than the conventions ~~that have been~~ reproduced in this postulation.

There are relatively few interruption discovery strategies proposed for Ad Hoc systems, and the field has not been ~~totally~~ investigated ~~totally~~. ~~This research~~ We accept that the proposed IDS will have a positive effect ~~on the in~~ interruption location for remote portable Ad Hoc systems. ~~This~~



study's ~~Our~~ interruption identification and reaction convention for MANETs have been shown ~~need~~ perform better than ~~indicated by Stamouli et al. depicted in~~ [14], ~~in regards to regarding~~ false parcels conveyed. The connection changes and course changes are ~~s~~ with a high likelihood, straight capacities of the greatest rate, and the hub stop time. In less upsetting situations, IDAODV beats measurements with the exception of convention overheads. ~~On interest~~ conventions spread the connection changes ~~faster speedier~~, and diminish the parcel drop brought about by them. System is the overwhelming explanation behind bundle drop. The ~~convention's~~ execution ~~of the~~ ~~be~~ enhanced if blockage ~~is might be~~ evaded.

#### Focal ~~P~~oints of the Proposed Scheme:

1. The proposed plan causes no additional overhead, as it makes insignificant alterations to ~~the~~ current information structures and capacities identified with ~~posting a~~ terrible ~~posting a~~ hub in the current rendition of ~~the~~ unadulterated AODV.
2. The proposed plan is more productive ~~in regards to as far as~~ the ~~created~~ resultant courses ~~created~~, asset reservations and computational multifaceted natures.
3. On the off chance that different noxious hubs work together, they ~~will be~~ thusly ~~will be~~ confined and segregated by their ~~neighbors neighbours~~, on the grounds that they screen and activity control over sending RREQs ~~to by~~ hubs. Subsequently, the plan effectively averts appropriated assaults.

#### Evaluation of ~~the~~ Sequence Number Attack Detection

The measurements ~~that were~~ utilis~~ed~~ within the assessment of the Sequence Number Attack Detection and ~~the~~ countermeasure instrument ~~include are~~ the conveyance degree, the quantity of false directing bundles sent by the aggressor, ~~and~~ false positive and location rates. In figures (3) conveyance proportion is plotted as ~~the~~ hub portability or thickness increments. The standardis~~ed~~ overhead of AODV is 2-4 times more when the system is stacked. In the charts, the overhead of AODV is considered ~~through with~~ a completely stacked system. As might be ~~identified seen~~ from the chart, with IDAODV running ~~the~~, conveyance proportion is expanded ~~by by to the extent that~~ 72 ~~per cent~~%.

The second metric ~~that was~~ utilis~~ed~~ ~~within~~ the assessment of this assault ~~i was~~ the quantity of false bundles sent by the assaulting hub, versus the quantity of dynamic associations and the hub portability. This metric was utilis~~ed~~ ~~in order~~ to look at the overhead of the grouping number assault, and ~~this study we~~ considered just the additional cost of ~~the~~ correspondence forced by the assault. ~~This study observed We watched~~ that the normal number of RREP sent by the noxious hub ~~through in~~ all the trials was 1,856, and ~~that~~ the quantity of hubs ~~that that~~ embedded the false course into their steering table was 20 out of 40.

Is this what was meant? I'm not :Commented [u20] sure, but I standardised it with a similar statement earlier in the text

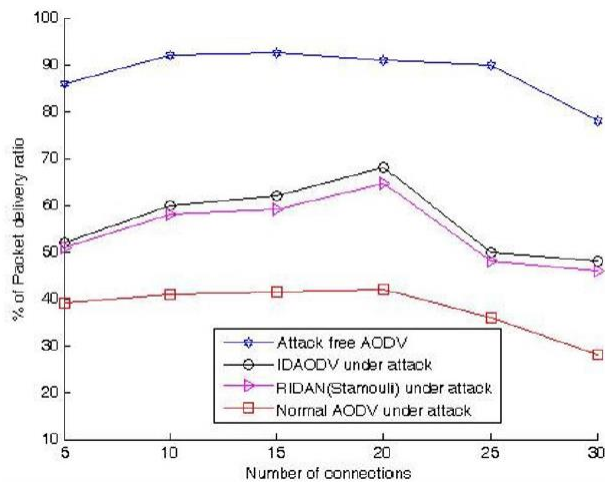

Figure 3: Packet Delivery Ratio Vs Number of Connections

In the above, '% of Packet delivery ratio' should be 'Percentage of packet delivery ratio'

I would also put a space between 'RIDAN' and Stamouli  
The above should be repeated in every graph

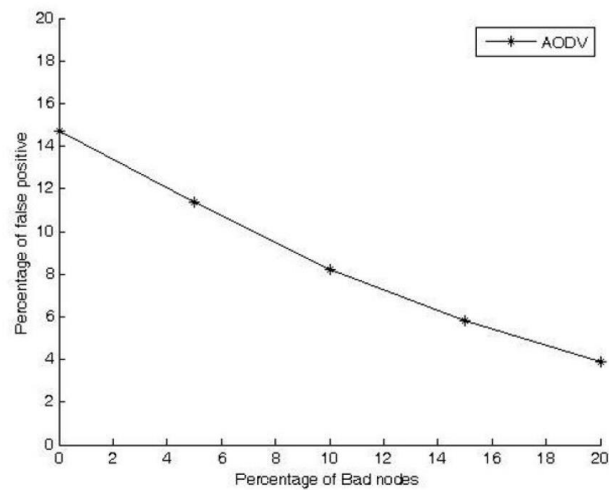

Figure 4: Packet Delivery Ratio Vs Number of Connections

In the above, 'false positive' should be 'false positives', and 'Bad nodes' should be 'bad nodes'

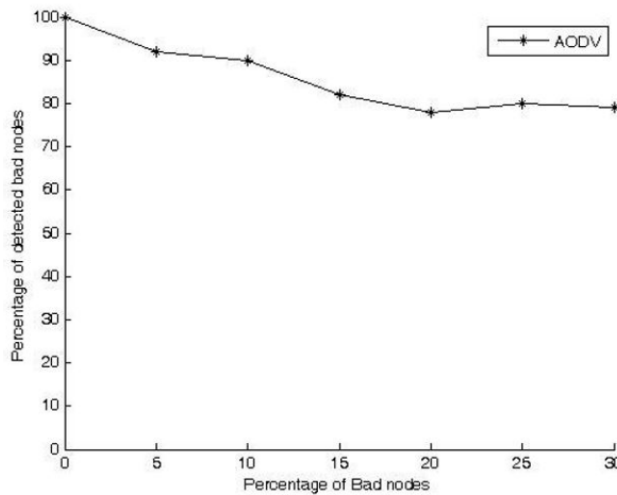

Figure 5: Packet Delivery Ratio Vs Number of Connections

In the above 'Bad nodes' should be 'bad nodes' :Commented [u23]

In figure 4, false positives are hubs that have been mistakenly marked as vindictive. Of course, the execution of the Active reaction convention enhanced the concerning false positives, as the thickness of the vindictive hubs expanded.

Figure 5 demonstrates the recognition rate. In the best case, 94 per cent% of the assaults could be located. However in, though; the most pessimistic scenario the location rate was 80 per cent%. There are a few reasons why an an awful n awful-hub may go undetected. First and foremost, the terrible hub may not be in any way be in the steering reserve each one-time when the screens start to check. Since the ways are built singularly, in light of the ways maintainedkept up by atthe directing reserve, if a hub is not contained in any way, its sending capacity will not~~en't~~ be checked. Secondly, there may be two continuous terrible hubs in a path, with the awful conduct of one hub is-covered up by the other awful hub.

#### Evaluation of the 'Drop Routing Packets' Attack Detection

To assess this assault, the measurements picked includedwere conveyance proportion and directing overhead degree. The accompanying charts demonstrate the execution. Figure ~~(6)~~ demonstrates that the IDAODV framework enhances the conveyance degree by 51 per cent, in% contrasted with to the plain AODV. Figure ~~(7)~~ demonstrates that the steering overhead presented by the assault diminishes by 52 per cent%. IDAODV lessens the steering overhead proportion, in order to give or take the levels that typical AODV presentshows.

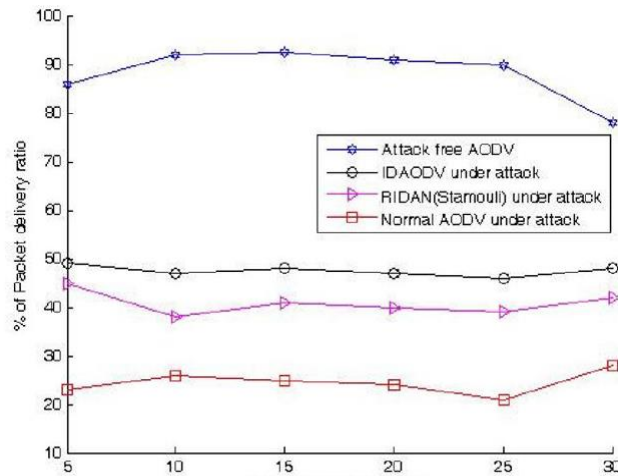

Figure (6): Packet Delivery Ratio Vs Number of Connections

In the above 'Packet delivery :Commented [u24]'.ratio yratio' should be 'packet deliver

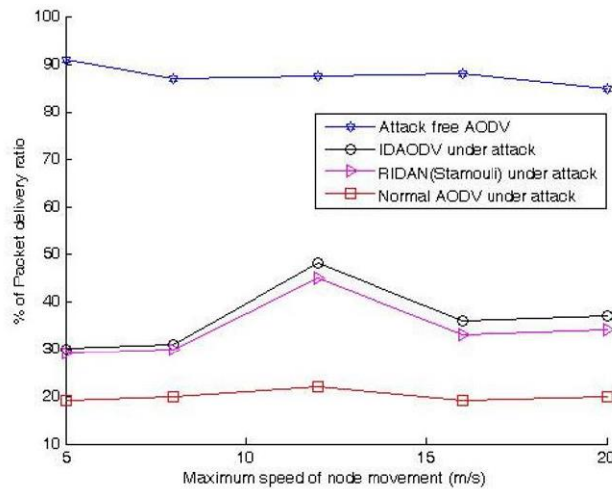

Figure (7): Packet Delivery Ratio Vs Node Mobility

Please duplicate the same :Commented [u25] corrections used in the above graphs

### Performance Comparison Analysis with the RIDAN System

In this section, this study presents the consequences of this study's own investigation by utilizing the NS-2 test system for an Ad Hoc system, comprised of 40 hubs. The researchers expect that there is one gatecrasher sending a grouping of sequential bundles, constituting an assault onto the objective [18]. The interruption is considered viewed as to be recognized if the assault bundles pass through any of the hubs that

constitute the interruption recognition framework. ~~This study has~~ ~~We~~ ~~utilized~~ an arbitrarily chosen set of ~~five~~ ~~5~~ ~~hubs~~ out of 40 hubs, ~~and have~~ explored different avenues ~~regarding presented~~ [14], and ~~have considered~~ a succession of five back to back parcels as constituting ~~the an~~ assault signature. ~~This study~~ ~~We~~ discovered the precision of identification both in ~~regards to~~ static and conditions. It is not clear in Stamouli [14], how an assault ~~that requiring~~ ~~s~~ more than one-bounce ~~begets~~ discovered, yet in IDAODV, multi-hop data is considered which beats the limit of the framework. ~~The researchers~~ ~~We~~ have created a rate of discovery of assault, ~~utilizing~~ ~~the~~ RIDAN framework [14] for both static and element hub cases, which ~~were~~ ~~as~~ not introduced in the earlier of the work, ~~and~~ ~~We~~ have ~~also provided~~ ~~given~~ a relative execution of ~~the~~ IDAODV and RIDAN underneath.

### For ~~the~~ Static Case

~~In this case,~~ ~~c~~ Consider that there is ~~only one one and only~~ hub in the interruption recognition framework, ~~a~~ ~~This hub is~~ arbitrarily chosen to be one ~~of the~~ ~~hubs~~ out of 40. ~~This study~~ ~~We~~ considers a framework in which ~~the~~ hubs ~~that constituting~~ the interruption identification framework (IDS) are picked haphazardly. ~~This~~ ~~We~~ demonstrates the results ~~of for~~ frameworks with ~~the~~ number of Nodes ~~set at~~ 40, as indicated in Figure (8). ~~It can be~~ ~~We~~ seen that the execution of IDAODV is superior to the RIDAN framework [14]. IDAODV likewise recognises multimode interruption recognition for a static condition.

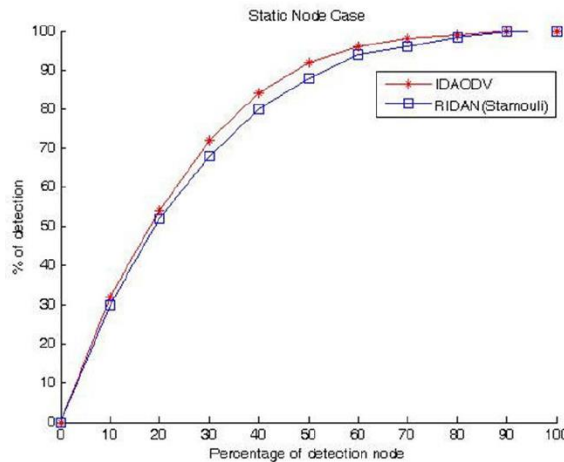

Figure (8): ~~P~~percentage of ~~D~~Detection

of detection' %', In the above :**Commented [u26]**  
'should be 'Percentage of detection

### For ~~the~~ Dynamic Case

In ~~the d~~Dynamic case, ~~we this study~~ considers a system ~~utilizing~~ ~~ing~~ AODV. ~~It is~~ ~~We~~ accepted that the interloper is moving at a pace of 15m/s. ~~The study changes~~ ~~We change~~ the foundation used to focus the hubs that make up the IDS. ~~It~~ ~~We~~ ~~utilizes~~ the same basis ~~utilised as utilized as a part of~~ ~~instance of utilized within~~ ~~connection with the~~ static case. The main contrast is that now the interloper is thought to be portable. ~~This study~~ ~~We~~ demonstrates the results ~~offor~~ such a case in

Figure (9). Here IDAODV additionally distinguishes multimode interruption discovery from an element condition. The above table offers ~~agives an~~ examination of the rate of identification between the RIDAN framework and the proposed system. For all estimations of the number of hubs, the location rate of the proposed strategy is higher than the RIDAN framework. The unpredictability of IDAODV is very nearly the same as that of the RIDAN framework.

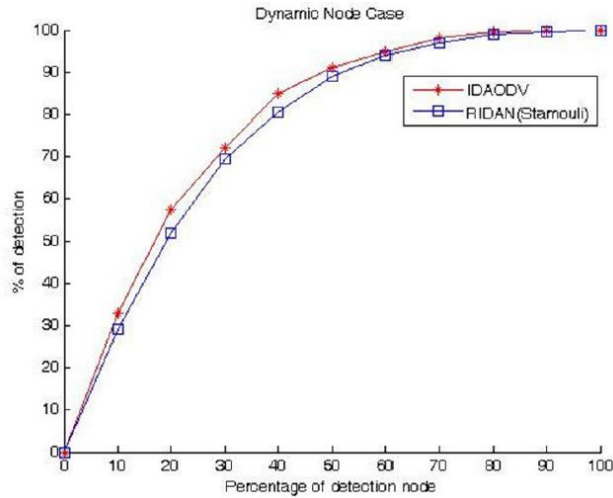

Figure (9): Percentage of Detection

Table (1) shows a comparison between IDAODV and RIDAN in terms of Average Value and Standard Deviation.

| Number of nodes   |                  | 20   | 40   | 60 | 80   |
|-------------------|------------------|------|------|----|------|
| Static node case  | RIDAN (Stamouli) | 52   | 80   | 94 | 98.5 |
|                   | IDAODV           | 54   | 84   | 96 | 99.4 |
| Dynamic node case | RIDAN (Stamouli) | 52   | 80.5 | 94 | 99   |
|                   | IDAODV           | 57.5 | 85.1 | 95 | 99.8 |

Table (1): Comparison between RIDAN and IDAODV in regards to Percentage of Detection

## Conclusion and Future Work

Again, in the above please :Commented [u27] change '% of detection' to 'Percentage of detection'

In the above table, I would :Commented [u28] recommend capitalising 'Static node case' and 'Dynamic node case'



~~In This paper has proposed the prevention of, we have proposed denial of~~ service attacks and intrusion detection (IDAODV) ~~through the use of for~~ MANET. ~~It We have~~ compared the results of ~~the~~ IDAODV and RIDAN frameworks, ~~and through this comparison it was determined that~~ IDAODV provided better results than the normal AODV under attack, and ~~the~~ RIDAN (Stamouli) ~~also~~ under attack ~~also~~. The proposed method has less processing and communication overhead ~~when~~ compared to ~~its~~ competitors. ~~The F~~future work, will improve the proposed algorithm to be implemented in other DoS attacks.

didn't Is this factually correct? I :Commented [u29]  
'quite understand the use of the term 'denial

## 6. References

- [1] J. Visumathi and K. L. L. Shunmuganathan, "An Effective IDS for MANET Using Forward Feature Selection and Classification Algorithms," *Procedia Eng.*, vol. 38, no. 0, pp. 2816–2823, Jan. 2012.
- [2] G. S. Mamatha and S. C. Sharma, "A Robust Approach to Detect and Prevent Network Layer Attacks in MANETS," *Int. J. Comput. Sci. Secur.*, vol. 4, no. 3, p. 275, 2010.
- [3] B. Wu, J. Chen, J. Wu, and M. Cardei, "A Survey of Attacks and Countermeasures in Mobile Ad Hoc Networks," in *Wireless Network Security*, Springer, 2007, pp. 103–135.
- [4] M. K. Rafsanjani, A. A. Khavasi, and A. Movaghar, "An efficient method for identifying IDS agent nodes by discovering compromised nodes in MANET," in *Computer and Electrical Engineering, 2009. ICCEE'09. Second International Conference on*, 2009, vol. 1, pp. 625–629.
- [5] E. A. Panaousis, C. Politis, K. Birkos, C. Papageorgiou, and T. Dagiuklas, "Security model for emergency real-time communications in autonomous networks," *Inf. Syst. Front.*, vol. 14, no. 3, pp. 541–553, 2012.
- [6] V. Tokekar, A. K. Jain, and Ashish Kumar Jain, "Classification of Denial of Service Attacks in Mobile Ad Hoc Networks," *IEEE*, no. DOI 10.1109/CICN.2011.51, 2011.
- [7] S. Mutlu and G. Yilmaz, "A Distributed Cooperative Trust Based Intrusion Detection Framework for MANETs," in *ICNS 2011, The Seventh International Conference on Networking and Services*, 2011, pp. 292–298.
- [8] C. Xenakis, C. Panos, and I. Stavrakakis, "A comparative evaluation of intrusion detection architectures for mobile ad hoc networks," *Comput. Secur.*, vol. 30, no. 1, pp. 63–80, Jan. 2011.
- [9] A. Nadeem and M. Howarth, "A Survey of MANET Intrusion Detection & Prevention Approaches for Network Layer Attacks," *Commun. Surv. Tutorials, IEEE*, vol. PP, no. 99, pp. 1–19, 2013.
- [10] D. Kheyri and M. Karami, "A Comprehensive Survey on Anomaly-Based Intrusion Detection in MANET," *Comput. Inf. Sci.*, vol. 5, no. 4, pp. 132–139, Jun. 2012.
- [11] A. Nadeem and M. Howarth, "Adaptive intrusion detection & prevention of denial of service attacks in MANETs," in *Proceedings of the 2009 International Conference on Wireless Communications and Mobile Computing: Connecting the World Wirelessly*, 2009, pp. 926–930.

- [12] J. F. C. Joseph, B.-S. Lee, A. Das, and B.-C. Seet, "Cross-layer detection of sinking behavior in wireless ad hoc networks using SVM and FDA," *Dependable Secur. Comput. IEEE Trans.*, vol. 8, no. 2, pp. 233–245, 2011.
- [13] D. Damopoulos, S. A. Menesidou, G. Kambourakis, M. Papadaki, N. Clarke, and S. Gritzalis, "Evaluation of anomaly-based IDS for mobile devices using machine learning classifiers," *Secur. Commun. Networks*, vol. 5, no. 1, pp. 3–14, 2012.
- [14] I. Stamouli, P. G. Argyroudis, and H. Tewari, "Real-time intrusion detection for ad hoc networks," in *World of Wireless Mobile and Multimedia Networks, 2005. WoWMoM 2005. Sixth IEEE International Symposium on a*, 2005, pp. 374–380.
- [15] S. Djahel, F. Nait-Abdesselam, and Z. Zhang, "Mitigating packet dropping problem in mobile ad hoc networks: Proposals and challenges," *Commun. Surv. Tutorials, IEEE*, vol. 13, no. 4, pp. 658–672, 2011.
- [16] K. Ilgun, R. A. Kemmerer, and P. A. Porras, "State transition analysis: A rule-based intrusion detection approach," *Softw. Eng. IEEE Trans.*, vol. 21, no. 3, pp. 181–199, 1995.
- [17] C.-Y. Tseng, P. Balasubramanyam, C. Ko, R. Limprasittiporn, J. Rowe, and K. Levitt, "A specification-based intrusion detection system for AODV," in *Proceedings of the 1st ACM workshop on Security of ad hoc and sensor networks*, 2003, pp. 125–134.
- [18] L. Tamilselvan and V. Sankaranarayanan, "Solution to Prevent Rushing Attack in Wireless Mobile Ad hoc Networks," in *Ad Hoc and Ubiquitous Computing, 2006. ISAUHC '06. International Symposium on*, 2006, pp. 42–47.

I found this report online: made :Commented [u30]  
 S. Mutlu and G. Yilmaz, "A Distributed an edit to the citation  
 Cooperative Trust Based Intrusion Detection Framework for  
 MANETS", in *ICNS 2011, The Seventh International Conference on  
 Networking and Services*, 2011, pp. 292–298.

V. Tokekar, A. K. Jain, (EDITED THIS NAME) – Looked up the  
 document and found that this the names of the study authors.  
 Please change this back if you have any concerns.
